# Supplementary material for: Out-of-pocket healthcare payments on chronic conditions impoverish urban poor in Bangalore, India
Source: PubMed Central journal article supplement (PMC3533578; doi:10.1186/1471-2458-12-990), 2012-11-16
Supplement: 1471-2458-12-990-S1.pdf [file 1471-2458-12-990-S1.pdf]

**Table S1 Monthly OOP payments per chronic condition according to type and level of healthcare services**

| Type of the health Services as place for consultation | Level of the health services | OOP payments on outpatient care (in INR) |                     |                  |
|-------------------------------------------------------|------------------------------|------------------------------------------|---------------------|------------------|
|                                                       |                              | Total                                    | Median (95% CL)     | Others           |
| <b>Government</b>                                     | Clinics/ health centers      | 200<br>(150, 250)                        | 200<br>(122.3, 250) | 0<br>(0, 0)      |
|                                                       | Referral hospitals           | 250<br>(200, 386.9)                      | 150<br>(0, 300)     | 60<br>(50, 100)  |
|                                                       | Super-specialty hospitals    | 280<br>(230, 300)                        | 120<br>(0, 300)     | 50<br>(32, 60.6) |
|                                                       | Overall                      | 250<br>(200, 300)                        | 150<br>(100, 200)   | 32<br>(32, 50)   |
| <b>Private</b>                                        | Clinics/ health centers      | 300<br>(290, 340)                        | 300<br>(270, 306.4) | 0<br>(0, 0)      |
|                                                       | Referral hospitals           | 480<br>(450, 500)                        | 450<br>(410, 500)   | 0<br>(0, 0)      |
|                                                       | Super-specialty hospitals    | 405<br>(330, 590)                        | 375<br>(300, 550)   | 30<br>(30, 30)   |
|                                                       | Overall                      | 400<br>(370, 400)                        | 360<br>(350, 400)   | 0<br>(0, 0)      |
